# Supplementary material for: Efficacy of Aftercare Services for People With Severe Mental Disorders in Iran: A Randomized Controlled Trial
Source: Atypon-hosted journal article supplement (doi:10.1176/appi.ps.201400111), 2014-12-17
Supplement: appi.ps.201400111.ds001.pdf [file appi.ps.201400111.ds001.pdf]

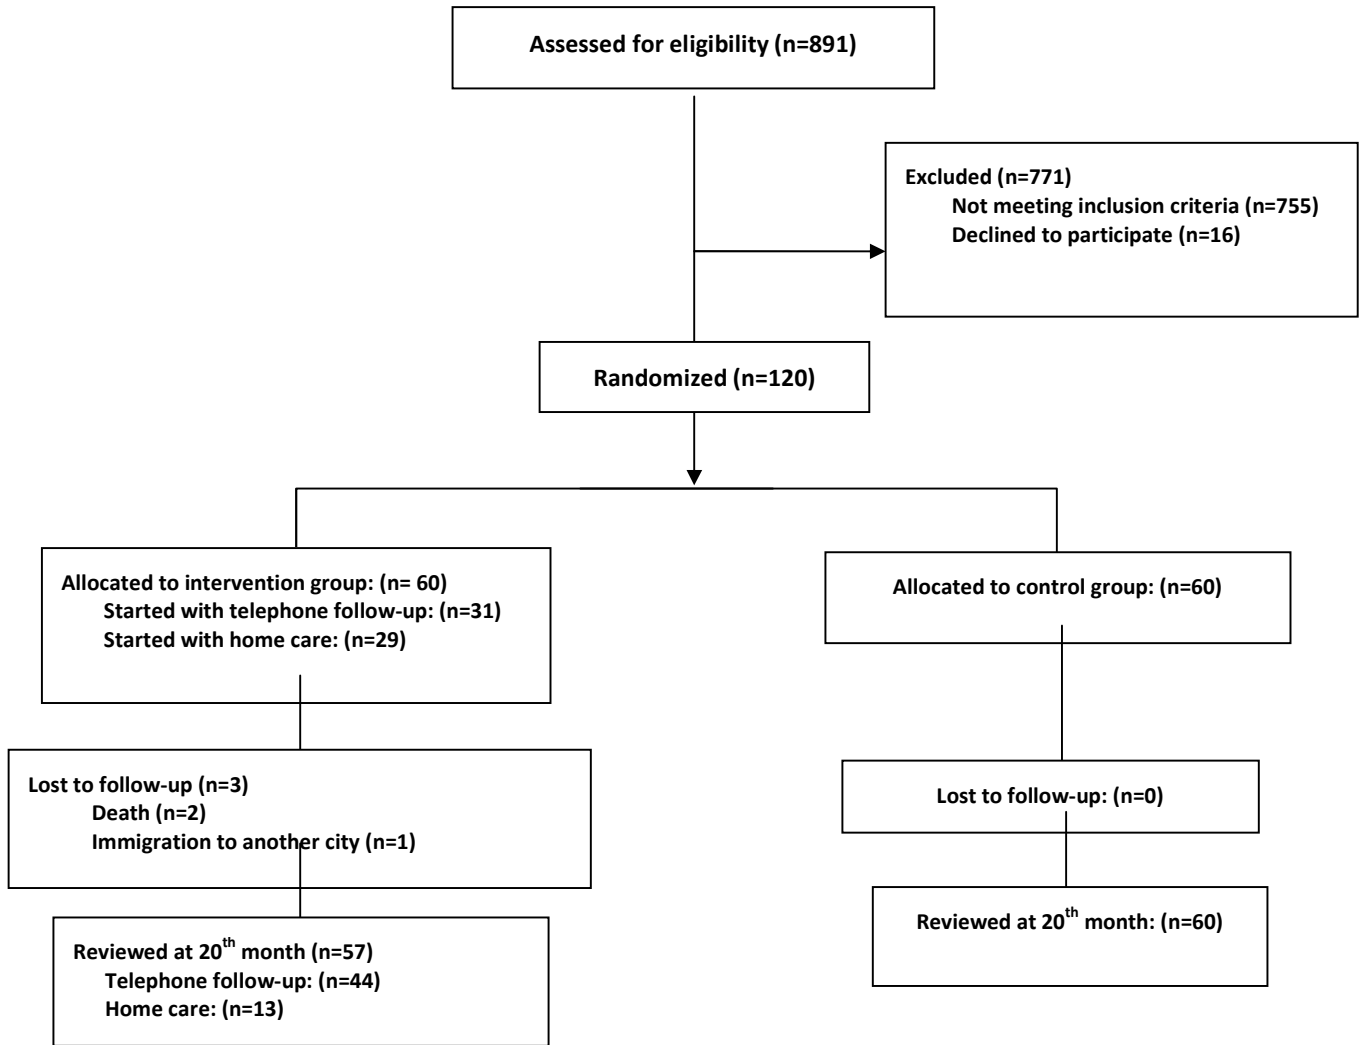

Figure 1: Study profile. The figure shows the flow of enrolling cases, their allocation, follow-up, drop-outs and analysis; the dropped cases were not detected as trial related.
